# Supplementary material for: Ovulation and ovarian wound healing are impaired with advanced reproductive age
Source: Aging (Albany NY). 2020 May 14;12(10):9686–713. doi: 10.18632/aging.103237 (PMC7288922; doi:10.18632/aging.103237)
Supplement: Supplementary Figures [file aging-12-103237-s001..pdf]

## SUPPLEMENTARY FIGURES

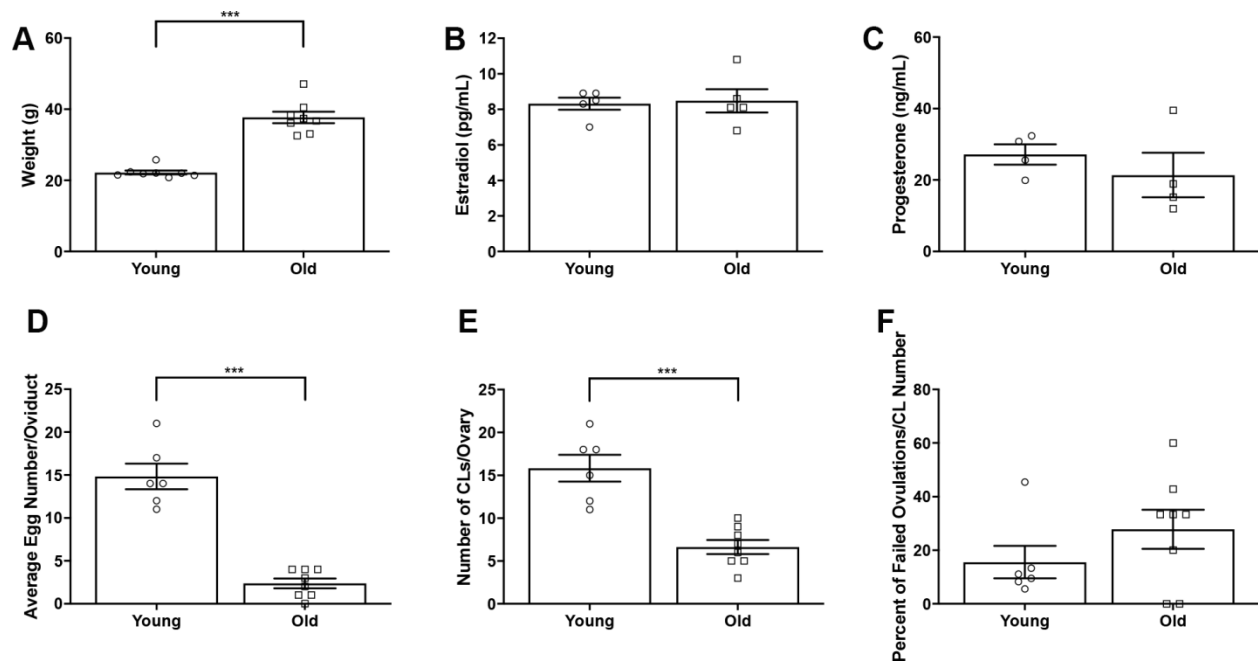

**Supplementary Figure 1. Reducing the hyperstimulation and superovulation dose of PMSG and hCG (2.5 IU) also results in age-related failed ovulation phenotypes.** (A) Weights of reproductively young and old mice (N = 8 mice per age group). A t-test was performed; asterisks denote significance (P = 0.0002). (B) Serum estradiol levels were assessed (reportable range 3–300pg/mL). A t-test was performed and there was no difference in estradiol levels between age cohorts. (C) Serum progesterone levels were assessed (reportable range 0.15–40.00 ng/mL). A t-test was performed and there was no difference between age cohorts. Graphs showing (D) the average number of eggs retrieved per oviduct and (E) the number of CLs tracked per ovary. T-tests were performed on both parameters; asterisks denote significance (D: P = 0.0003; E: P = 0.0007). (F) Graph showing the percent of failed ovulations per CL number for both age cohorts. A t-test was performed and the difference was not significant (P > 0.05). Data are represented as mean ± SEM.

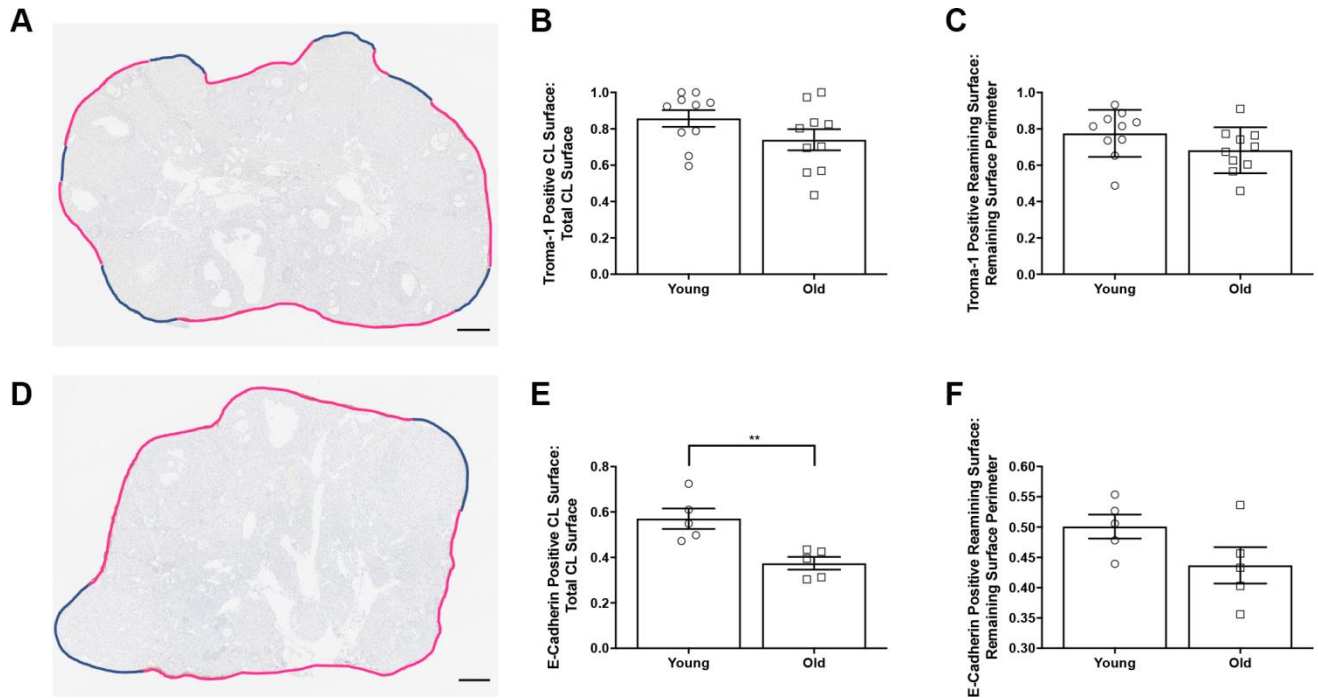

**Supplementary Figure 2. Impaired remodeling of the OSE with advanced reproductive age tends to be specific to CLs.** (A) Representative image of reproductively young ovary stained for Troma-1. CL surface is indicated by blue lines and remaining ovarian surface is indicated by pink lines. Graphs showing the proportion of the CL surface (B) and remaining ovarian surface (C) Troma-1 positive. (D) Representative image of reproductively old ovary stained for Troma-1. CL surface is indicated by blue lines and remaining ovarian surface is indicated by pink lines. Note that these images are the same as the tissue sections in Figure 11 (A, B). Graphs showing the proportion of the CL surface (E) and remaining ovarian surface (F) E-Cadherin positive.
